# Supplementary material for: A detailed gene expression study of the Miscanthus genus reveals changes in the transcriptome associated with the rejuvenation of spring rhizomes
Source: PubMed Central journal article supplement (PMC4046694; doi:10.1186/1471-2164-14-864), 2013-12-09

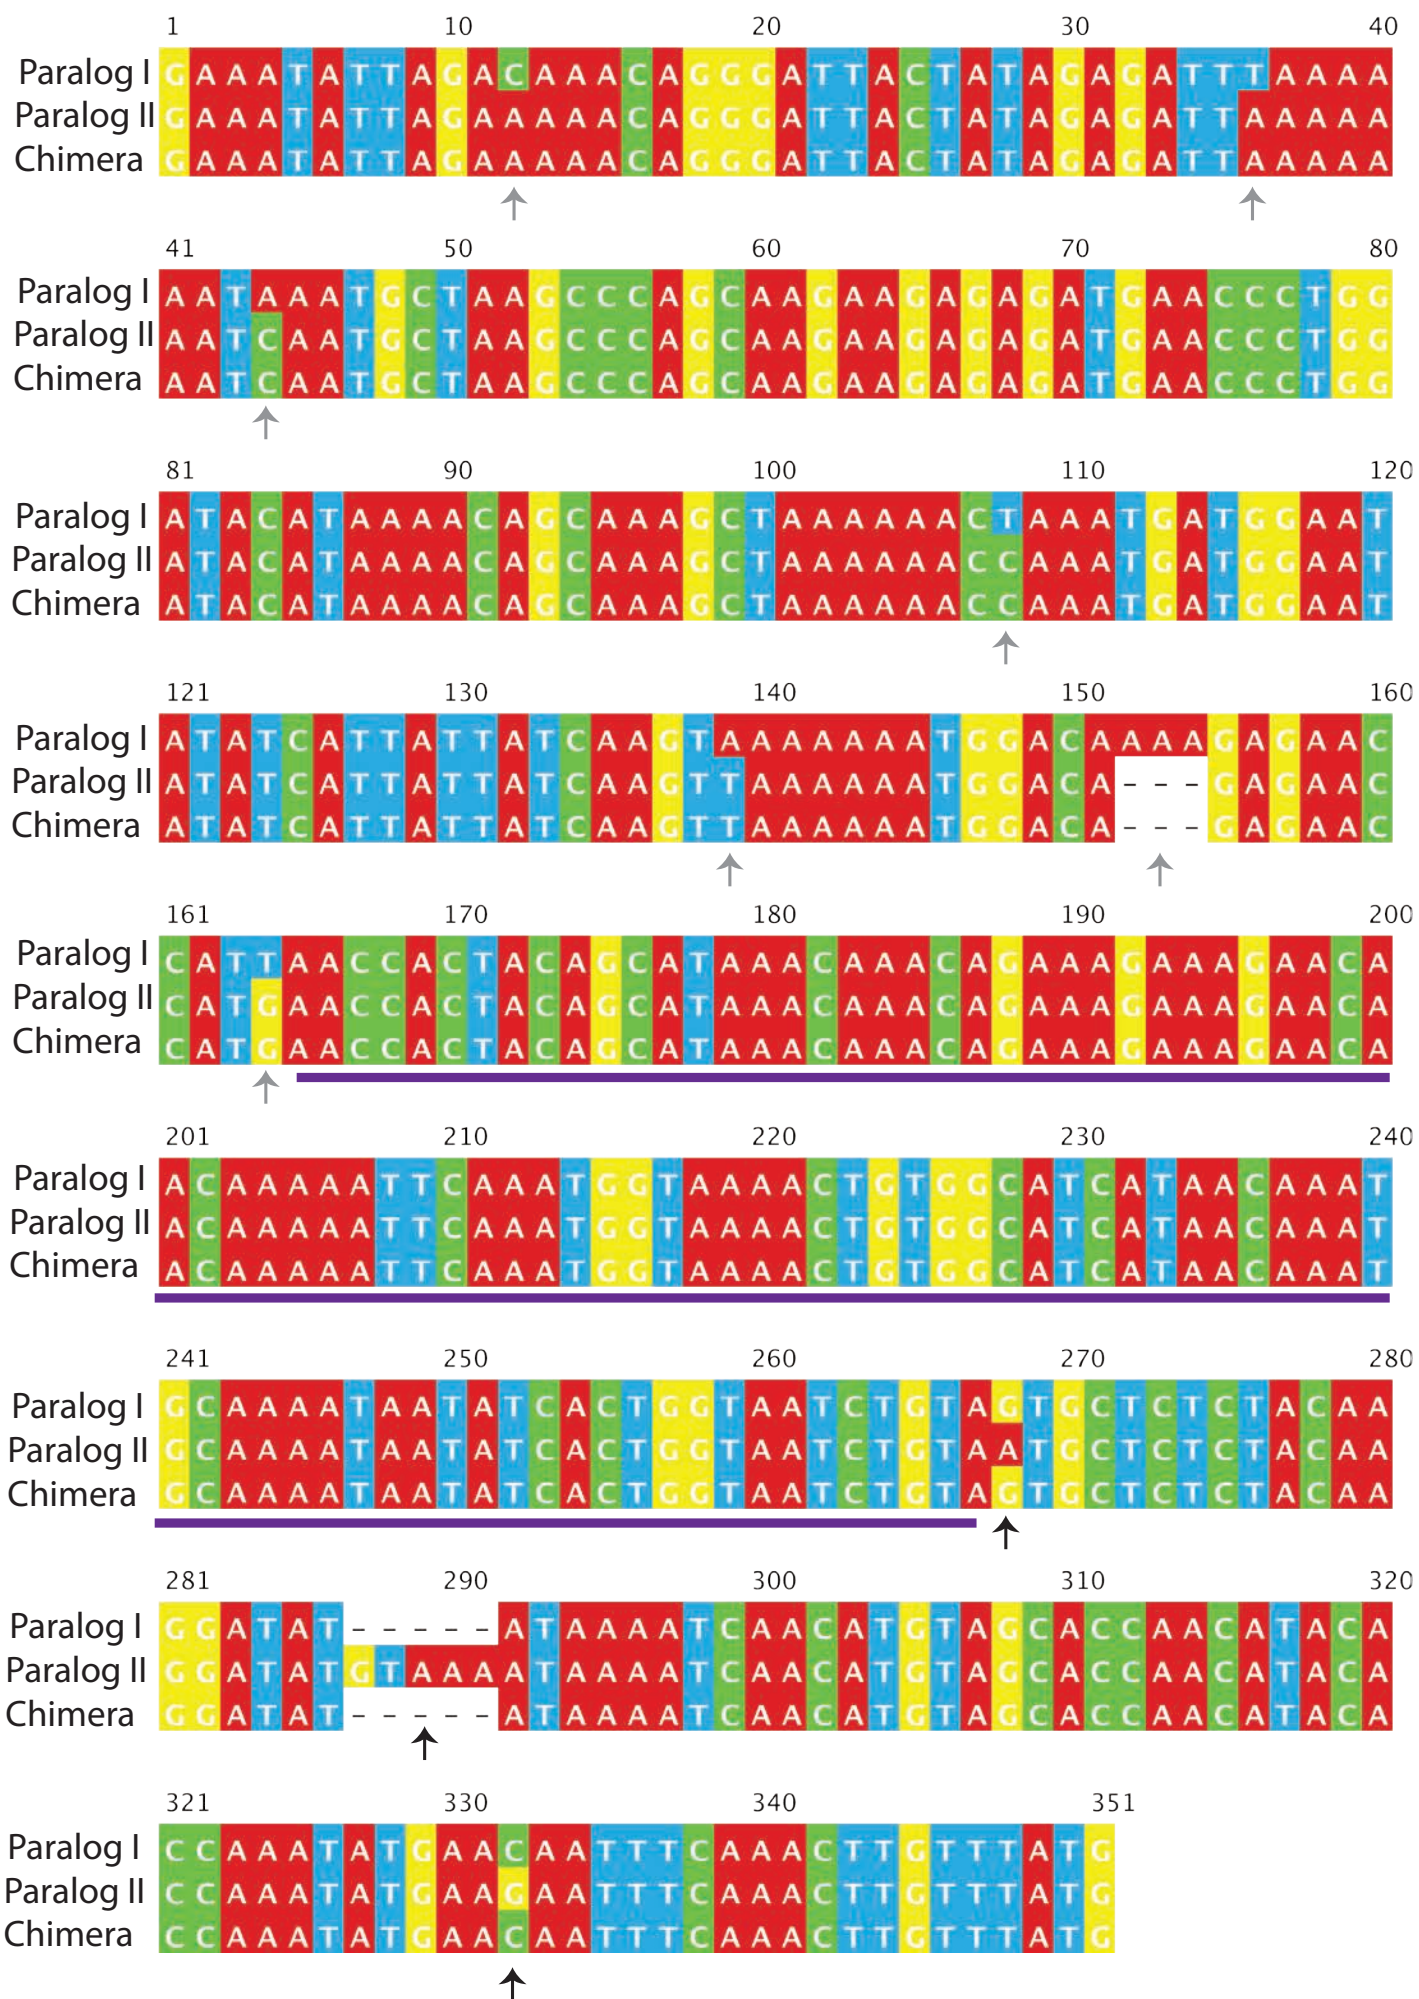

Supplement: 12864_2013_5559_MOESM4_ESM.pdf [file 12864_2013_5559_MOESM4_ESM.pdf]
